# Supplementary material for: Presence of recombination hotspots throughout SLC6A3
Source: PubMed Central journal article supplement (PMC6559656; doi:10.1371/journal.pone.0218129), 2019-06-11
Supplement: pone.0218129.s001.pdf [file pone.0218129.s001.pdf]

## -14kb-VNTR: Alignment of four alleles

```
VNTR14kb-1      acacacatgctcacatgactcatgctgaggcttacacatgtacacatgctcacatgac
VNTR14kb-2      acacacatgctcacatgactcatgctgaggcttacacatgtacacatgctcacatgac
VNTR14kb-4      acacacatgctcacatgactcatgctgaggcttacacatgtgacatgctcacatgac
VNTR14kb-3      acacacatgctcacatgactcatgctgaggcttacacatgtacacatgctcacatgac
*****

VNTR14kb-1      tcatgctgaggcttacacgtacacacatgctcacatgactcatgctgaggcttacacat
VNTR14kb-2      tcatgctgaggcttacacgtacacacatgctcacatgacgcatgctgaggcttacacat
VNTR14kb-4      tcatgctgaggcttacacgtacacacatgctcacatgactcatgctgaggcttacacat
VNTR14kb-3      tcatgctgaggcttacacgtacacacgtgctcacatgacgcatgctgaggcttacacat
*****

VNTR14kb-1      gtacacatgctcacatacactcatgctgaggcttacacatgtacacacatgctcacatgc
VNTR14kb-2      gtacacatgctcacatacactcatgctgaggcttacacatgtac-----
VNTR14kb-4      gtacacatgctcacatacactcatgctgaggcttacacatgtacacacatgctcacatgc
VNTR14kb-3      gtacacatgctcacatacactcatgctgaggcttacacatgtac-----
*****

VNTR14kb-1      actcatgctgaggcttacacatgtacacatgctcacatgactcatgctgaggcttacac
VNTR14kb-2      -----acacatgctcacatgactcatgctgaggcttacac
VNTR14kb-4      actcatgctgaggcttacacatgtacacatgctcacatgactcatgctgaggcttacac
VNTR14kb-3      -----acgcatgctcacatgactcatgctgaggcttacac
*****

VNTR14kb-1      atgtacacacatgctaacatgactcatgctgaggcttatgcatgtacacacatgctaac
VNTR14kb-2      atgtacacacatgctcacatgactcatgctgaggcttacacatgtacaca-----
VNTR14kb-4      atgtacacacatgctaacatgactcatgctgaggcttacacatgtacaca-----
VNTR14kb-3      atgtacacacatgctcacatgactcatgctgaggcttacacatgtacaca-----
*****

VNTR14kb-1      atgactcatgctgaggctcacatgactcatgctgaggcttacacgtacacacgtgctc
VNTR14kb-2      -----tgctc
VNTR14kb-4      -----tgctc
VNTR14kb-3      -----tgctc
*****

VNTR14kb-1      acatgactcatgctgaggcttacacatgtacacacatgctcacatgactcatgctgag
VNTR14kb-2      acatgactcatgctgaggcttacacatgtacacacatgctaacatgactcatgctgag
VNTR14kb-4      acatgactcatgctgaggcttacacatgtacacacatgctaacatgactcatgctgag
VNTR14kb-3      acatgactcatgctgaggcttacacatgtacacacatgctaacatgactcatgctgag
*****

VNTR14kb-1      gcttacacatgtacacac--gctcacatgactcatgctgaggctcacatgactcatgc
VNTR14kb-2      gcttacacatgtacacacatgctaacatgactcatgctgaggctcacatgactcatgc
VNTR14kb-4      gcttacacatgtacacacatgctaacatgactcatgctgaggctcacatgactcatgc
VNTR14kb-3      gcttacacatgtacacacatgctaacatgactcatgctgaggctcacatgactcatgc
*****

VNTR14kb-1      tgaggcttacacatgtacacatgctcacatgactcatgctgaggcttacacatgtacac
VNTR14kb-2      tgaggcttacacatgtacacacgtgctcacatgactcatgctgaggcttacacatgtacac
```

VNTR14kb-4 tgaggcttacacgtacacacgtgctcacatgcactcatgctgaggcttacacatgtacac  
VNTR14kb-3 tgaggcttacacgtacacacgtgctcacatgcactcatgctgaggcttacacatgtacac  
\*\*\*\*\* \* \* \* \* \*\*\*\*\*

VNTR14kb-1 acatgctcacatgcactcatgctgaggcttacacatgtacacatgctcacatgcactcat  
VNTR14kb-2 acatgctcacatgcactcatgctgaggcttacacatgtacacacgctcacatgcactcat  
VNTR14kb-4 acatgctcacatgcactcatgctgaggcttacacatgtacacacgcccacatgcactcat  
VNTR14kb-3 acatgctcacatgcactcatgctgaggcttacacatgtacacacgctcacatgcactcat  
\*\*\*\*\*

VNTR14kb-1 gctgaggcttacatgtacacacatgctcacatgcactcatgctgaggcttacacatgtac  
VNTR14kb-2 gctgaggcttac-----  
VNTR14kb-4 gctgaggcttac-----  
VNTR14kb-3 gctgaggcttac-----  
\*\*\*\*\*

VNTR14kb-1 acacatgctcacatgcactcatgctgaggcttacacatgtacacacgctcacatgcactc  
VNTR14kb-2 -----acatgtacacacatgctcacatgcactc  
VNTR14kb-4 -----acatgtacacacatgctcacatgcactc  
VNTR14kb-3 -----acatgtacacacatgctcacatgcactc  
\* \* \* \* \*

VNTR14kb-1 acgctgaggctcacatgcactcatgctgaggcttacacatgtacacacgctcacatgcac  
VNTR14kb-2 atgctgaggctcacatgcactcatgctgaggcttacacatgtacacatgctcacatgcac  
VNTR14kb-4 atgctgaggctcacatgcactcatgctgaggcttacacatgtacacatgctcacatgcac  
VNTR14kb-3 atgctgaggctcacatgcactcatgctgaggcttacacatgtacacatgctcacatgcac  
\* \* \* \* \*

VNTR14kb-1 tcatgctgaggc-tacatatgtacacacatgctcacatgcactcatgctgaggcttacac  
VNTR14kb-2 tcatgctgaggcttacatatgtacacacatgctcacatgcactcatgctgaggcttacac  
VNTR14kb-4 tcatgctgaggcttacatatgtacacacatgctcacatgcactcatgctgaggcttacac  
VNTR14kb-3 tcatgctgaggcttacatatgtacacacatgctcacatgcactcatgctgaggctt---  
\*\*\*\*\*

VNTR14kb-1 gtgtacacatgctcacatgcactcatgctgagnctnacatgtacacacatgctcacatgc  
VNTR14kb-2 atgtacacacgctcacatgcactcatgctgaggcttacatgtacacacatgctcacatgc  
VNTR14kb-4 atgtacacatgctcacatgcactcatgctgaggct-acatgtacacacatgctcacatgc  
VNTR14kb-3 -----

VNTR14kb-1 actcatgctgaggctt  
VNTR14kb-2 actcatgccgaggctt  
VNTR14kb-4 actcatgctgaggctt  
VNTR14kb-3 -----

## SSLP at +1531 has nine alleles in African and Caucasian Americans

1. AAGA<sub>4</sub>(CAA)<sub>5</sub>A<sub>5</sub>(CA)<sub>4</sub>A<sub>4</sub>
2. AAGA<sub>4</sub>(CAA)<sub>5</sub>A<sub>4</sub>C<sub>8</sub>A<sub>5</sub>
3. A<sub>7</sub>(CAA)<sub>5</sub>A<sub>5</sub>(CA)<sub>4</sub>A<sub>4</sub>
4. A<sub>7</sub>(CAA)<sub>5</sub>A<sub>4</sub>C<sub>8</sub>A<sub>5</sub>
5. A<sub>7</sub>(CAA)<sub>4</sub>A<sub>7</sub>(CA)<sub>4</sub>A<sub>4</sub>
6. A<sub>7</sub>(CAA)<sub>2</sub>A<sub>3</sub>CA<sub>9</sub>(CA)<sub>4</sub>A<sub>4</sub>
7. A<sub>7</sub>(CAA)<sub>4</sub>A<sub>6</sub>C<sub>8</sub>A<sub>5</sub>
8. GA<sub>7</sub>(CAA)<sub>3</sub>A<sub>7</sub>(CA)<sub>6</sub>A<sub>2</sub>
9. GA<sub>4</sub>(CAA)<sub>5</sub>A<sub>5</sub>(CA)<sub>4</sub>A<sub>4</sub>

**S1 Fig.** Details of multiple alleles of -14kb-VNTR (*upper panel*) and Intron 1 SSLP (*lower panel*).
