# Supplementary material for: Presence of recombination hotspots throughout SLC6A3
Source: PubMed Central journal article supplement (PMC6559656; doi:10.1371/journal.pone.0218129), 2019-06-11
Supplement: pone.0218129.s004.pdf [file pone.0218129.s004.pdf]

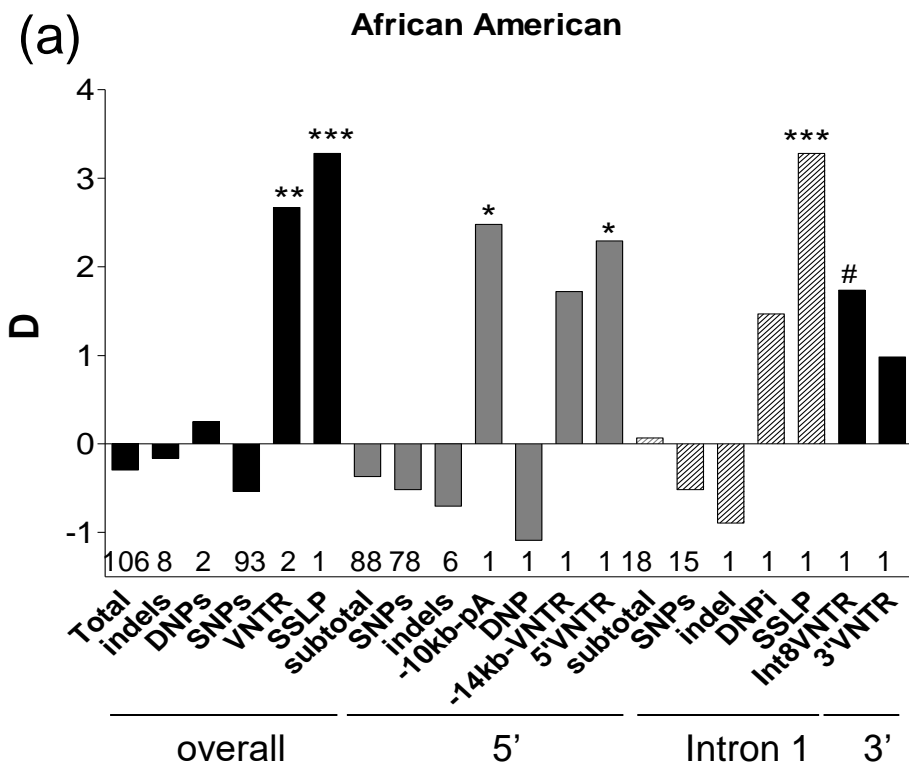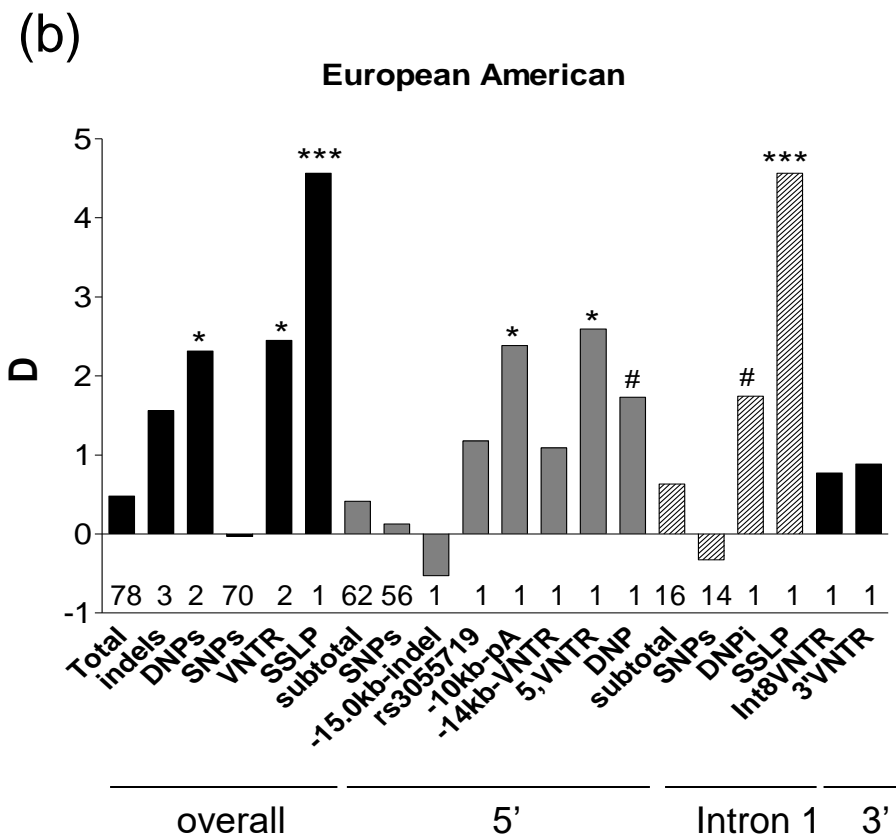

**Fig S4.** Genetic selection of polymorphisms by Tajima's statistic D for AA (a) and EA (b). Polymorphisms are categorized by types for entire 18 kb regions (Overall, black bars where -10kb-pA is in indel), 5' regions (5', gray bars) and Intron 1 (hatched bars). Int8VNTR and 3'VNTR are listed on right side. #,  $p < 0.1$ ; \*,  $p < 0.05$ ; \*\*,  $p < 0.01$ ; and \*\*\*,  $p < 0.001$ , based on  $\beta$  distribution.<sup>38</sup>
