# Supplementary material for: Presence of recombination hotspots throughout SLC6A3
Source: PubMed Central journal article supplement (PMC6559656; doi:10.1371/journal.pone.0218129), 2019-06-11
Supplement: pone.0218129.s005.pdf [file pone.0218129.s005.pdf]

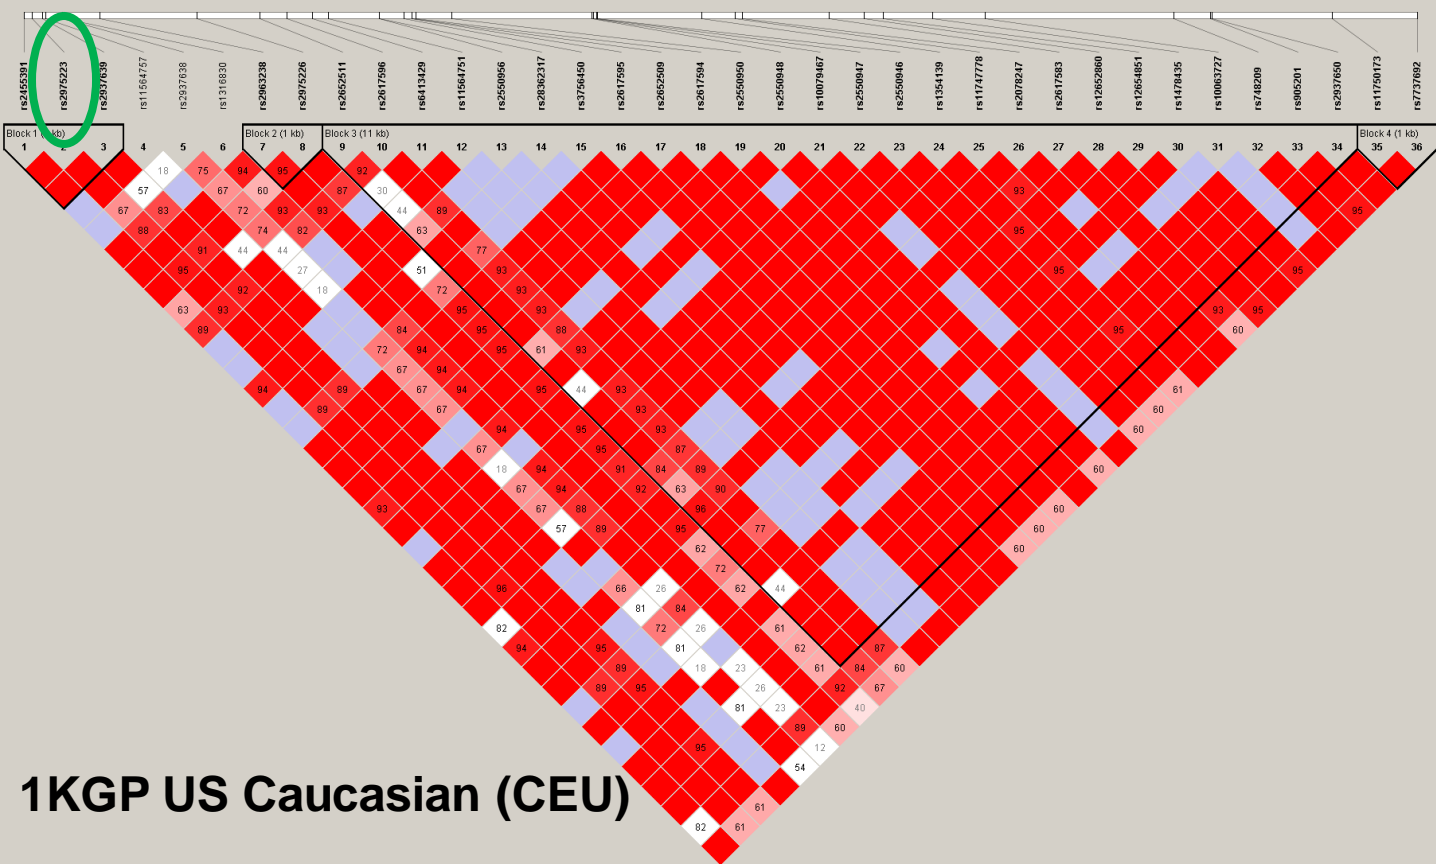

# 1KGP US Caucasian (CEU)

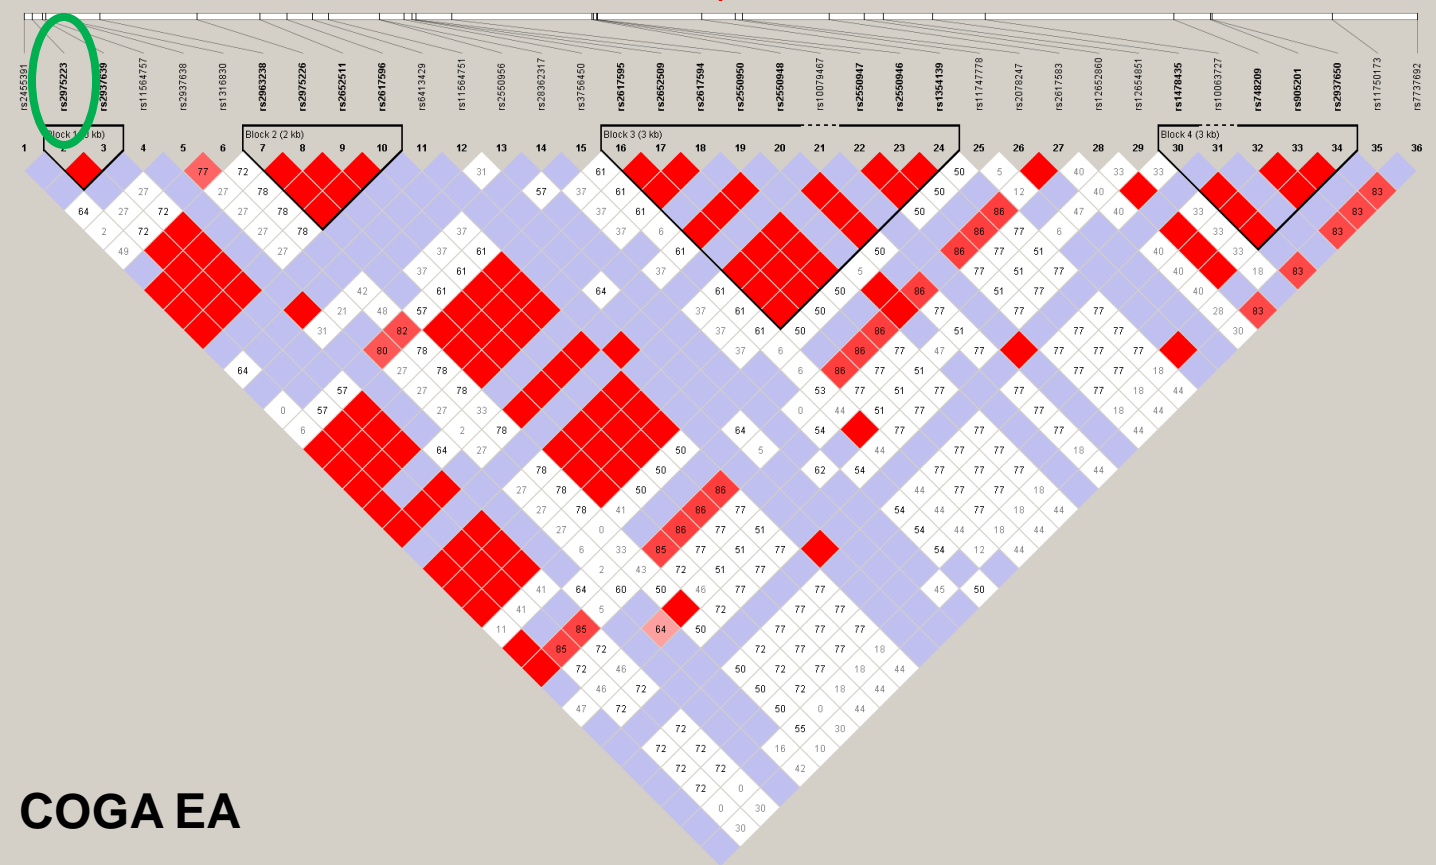

# COGA EA

**S5 Fig. Significant difference in 18 kb *SLC6A3* promoter LD (D') between 1KGP CEU (upper) and COGA sample (30 controls and 30 patients with SUDs). Green circles rs2975223/DNPI.**
