# Supplementary material for: Presence of recombination hotspots throughout SLC6A3
Source: PubMed Central journal article supplement (PMC6559656; doi:10.1371/journal.pone.0218129), 2019-06-11
Supplement: pone.0218129.s007.pdf [file pone.0218129.s007.pdf]

**S2 Table. Common and unique alleles in COGA samples.**

| chr5<br>position <sup>a</sup> | rs#          | Functional<br>position <sup>b</sup> | alleles<br>major/minor | MAF<br>AA                | EA                                 |
|-------------------------------|--------------|-------------------------------------|------------------------|--------------------------|------------------------------------|
| 1443498                       | rs2455391    | +2051                               | C/T                    | 0.0333                   | 0.25                               |
| 1443532 <sup>c</sup>          | chr5:1443532 | +2017                               | C/G                    | 0                        | 0.01666                            |
| 1443603                       | rs2975223    | +1946                               | A/G                    | 0.35                     | 0.51666                            |
| 1443604                       | rs67175440   | +1945                               | G/A                    | 0.35                     | 0.51666                            |
| 1443702                       | rs12332463   | +1847                               | G/A                    | 0.0333                   | 0                                  |
| 1443728                       | rs2937639    | +1821                               | A/G                    | 0.2833                   | 0.51666                            |
| 1443762                       | rs28382219   | +1787                               | G/A                    | 0.1666                   | 0.0333                             |
| 1443946                       | chr5:1443947 | +1603                               | G/A                    | 0                        | 0.05                               |
| 1443954                       | chr5:1443955 | +1595                               | A/T                    | 0                        | 0.05                               |
| 1443973                       | rs2937638    | +1576                               | A/C                    | 0.2666                   | 0.81666                            |
| 1443976                       | rs11564754   | +1573                               | C/A                    | 0.0833                   | 0                                  |
| 1443990                       | rs1316830    | +1559                               | A/G                    | 0.18333                  | 0.7333                             |
| 1444018                       | SSLP         | +1531                               | 1/2,3,5,6,7,8,9        | 0.15/0.11666/0.35/0.2833 | 0.0333/0.18333/0/0/0.01666/0.01666 |
| 1444251                       | chr5:1444252 | +1298                               | G/A                    | 0                        | 0.01666                            |
| 1444427                       | rs2963238    | +1122                               | A/C                    | 0.333                    | 0.51666                            |
| 1444518                       | +1kb-indel   | +1031                               | (GAGT)1/2              | 0.0333                   | 0                                  |
| 1444581                       | rs28382215   | +968                                | T/C                    | 0                        | 0.01666                            |
| 1444805                       | rs116037986  | +744                                | G/A                    | 0.0666                   | 0                                  |
| 1444817                       | rs2911493    | +732                                | G/A                    | 0.0833                   | 0                                  |
| 1444970                       | rs28382214   | +579                                | G/A                    | 0.05                     | 0                                  |
| 1444985                       | rs2735857    | +564                                | G/T                    | 0.0333                   | 0.08333                            |
| 1445141                       | rs370269420  | +408                                | G/T                    | 0.0166                   | 0                                  |
| 1445210                       | chr5:1445211 | +339                                | G/C                    | 0                        | 0.0166                             |

|         |              |       |     |         |         |
|---------|--------------|-------|-----|---------|---------|
| 1445228 | chr5:1445229 | +321  | G/A | 0.01666 | 0       |
| 1445240 | chr5:1445241 | +309  | G/C | 0       | 0.0166  |
| 1445525 | rs45611137   | +24   | G/T | 0.01666 | 0       |
| 1445617 | rs2975226    | -68   | T/A | 0.28333 | 0.055   |
| 1446210 | rs113362701  | -661  | C/G | 0       | 0.01666 |
| 1446224 | rs2735852    | -675  | G/A | 0.0333  | 0       |
| 1446289 | rs536849094  | -740  | C/A | 0       | 0.01666 |
| 1446351 | rs115964423  | -802  | C/T | 0       | 0.01666 |
| 1446390 | rs2652511    | -841  | T/C | 0.3666  | 0.5333  |
| 1446445 | rs574461033  | -896  | C/G | 0.05    | 0       |
| 1446720 | rs2617596    | -1171 | G/C | 0.1666  | 0.55    |
| 1446953 | chr5:1446954 | -1404 | G/T | 0.0166  | 0       |
| 1447028 | rs6413429    | -1479 | G/T | 0.1333  | 0.0333  |
| 1447104 | rs112555354  | -1555 | C/T | 0.1     | 0       |
| 1447224 | rs11564751   | -1675 | T/C | 0.1333  | 0.0666  |
| 1447383 | rs2937637    | -1834 | C/A | 0.1     | 0       |
| 1447413 | rs540351375  | -1864 | C/T | 0       | 0.0166  |
| 1447575 | rs2937636    | -2026 | C/T | 0.1     | 0       |
| 1447603 | rs7733388    | -2054 | C/T | 0.0166  | 0       |
| 1447723 | rs116211357  | -2174 | G/A | 0       | 0.0166  |
| 1447763 | rs11564749   | -2214 | C/G | 0.0333  | 0.08333 |
| 1447842 | rs2550956    | -2293 | C/T | 0.0333  | 0.1333  |
| 1447845 | rs28362317   | -2296 | A/T | 0.0166  | 0.0666  |
| 1447861 | rs11564749   | -2312 | G/A | 0.2     | 0.5166  |
| 1447873 | rs2937635    | -2324 | C/T | 0.1     | 0       |
| 1447898 | rs2975225    | -2349 | G/C | 0.1     | 0       |
| 1448029 | rs145806429  | -2480 | G/A | 0.0166  | 0       |
| 1448149 | rs3756450    | -2600 | T/C | 0.4666  | 0.18333 |

|         |              |       |          |         |         |
|---------|--------------|-------|----------|---------|---------|
| 1448247 | rs2617595    | -2698 | G/A      | 0.2     | 0.5333  |
| 1448248 | rs2652509    | -2699 | T/C      | 0.31666 | 0.5333  |
| 1448289 | rs2617594    | -2740 | T/C      | 0.2     | 0.5333  |
| 1448347 | rs138035505  | -2798 | G/T      | 0       | 0.0333  |
| 1448731 | rs2550950    | -3182 | G/A      | 0.0333  | 0.2666  |
| 1448876 | rs2963236    | -3327 | C/T      | 0.1     | 0       |
| 1449607 | rs111664342  | -4058 | C/T      | 0.0333  | 0       |
| 1449818 | rs146316575  | -4269 | G/A      | 0.0166  | 0       |
| 1450374 | rs188332761  | -4825 | T/C      | 0       | 0.01666 |
| 1450445 | rs2550948    | -4896 | G/A      | 0.2333  | 0.5333  |
| 1450462 | rs10079467   | -4913 | A/G      | 0.1166  | 0.0333  |
| 1450507 | rs2550947    | -4958 | A/G      | 0.2333  | 0.5333  |
| 1450514 | rs2550946    | -4965 | T/C      | 0.2333  | 0.5333  |
| 1450982 | -5kb-2A      | -5433 | (A)11/10 | 0.0166  | 0       |
| 1451036 | rs145859386  | -5487 | G/A      | 0.0166  | 0.0333  |
| 1451382 | rs115288709  | -5833 | C/T      | 0.0333  | 0       |
| 1451601 | chr5:1451131 | -6052 | A/C      | 0       | 0.01666 |
| 1451783 | rs1354139    | -6234 | A/G      | 0.3166  | 0.5333  |
| 1452194 | rs11747778   | -6645 | G/A      | 0.0333  | 0.2     |
| 1452199 | rs116380738  | -6650 | T/C      | 0.0166  | 0.01666 |
| 1452280 | rs114959205  | -6731 | T/C      | 0.0333  | 0       |
| 1452281 | rs2078247    | -6732 | C/G      | 0.1166  | 0.2666  |
| 1452414 | rs141180644  | -6865 | G/A      | 0       | 0.01666 |
| 1452621 | rs60987235   | -7072 | G/A      | 0.11666 | 0       |
| 1452824 | rs2975224    | -7275 | G/A      | 0.1     | 0       |
| 1453003 | chr5:1453003 | -7454 | TC/-     | 0.0166  | 0       |
| 1453191 | rs113127698  | -7642 | C/G      | 0.05    | 0       |
| 1453251 | rs563628594  | -7702 | A/G      | 0.0166  | 0       |

|         |                   |        |            |                   |               |
|---------|-------------------|--------|------------|-------------------|---------------|
| 1453345 | rs2617583         | -7796  | G/T        | 0.2166            | 0.4666        |
| 1453772 | rs12652860        | -8223  | G/T        | 0.3               | 0.3           |
| 1454004 | rs12654851        | -8455  | C/A        | 0.1666            | 0.1333        |
| 1454060 | rs142832833       | -8511  | C/T        | 0.0166            | 0             |
| 1454288 | rs539605060       | -8739  | C/T        | 0.0166            | 0             |
| 1454536 | rs9312868         | -8987  | C/T        | 0.0333            | 0             |
| 1454609 | rs546701427       | -9060  | C/T        | 0                 | 0.01666       |
| 1454612 | rs1478435         | -9063  | G/A        | 0.1666            | 0.3           |
| 1455101 | rs1478434         | -9552  | G/A        | 0.1               | 0             |
| 1455187 | chr5:1455188      | -9638  | A/G        | 0                 | 0.01666       |
| 1455237 | rs575581666       | -9688  | G/A        | 0.0166            | 0             |
| 1455250 | rs10063727        | -9701  | C/T        | 0.11666           | 0.0333        |
| 1455329 | chr5:1455330      | -9780  | G/A        | 0.0166            | 0             |
| 1455482 | rs34813657        | -9933  | C/T        | 0.0666            | 0.1833        |
| 1455516 | rs4639276         | -9967  | G/A        | 0.2166            | 0.51666       |
| 1455728 | rs141802731       | -10179 | C/T        | 0.0166            | 0             |
| 1455799 | rs72717506        | -10250 | C/T        | 0.11666           | 0.0666        |
| 1455820 | chr5:1455820      | -10271 | T/C        | 0.0166            | 0             |
| 1455880 | -10kb-pA          | -10331 | 9/10/11    | 0.2833/0.5/0.2166 | 0.15/0.5/0.35 |
| 1455929 | chr5:1455929      | -10380 | A/G        | 0                 | 0.0166        |
| 1455946 | rs6860992         | -10397 | G/A        | 0.2166            | 0.5166        |
| 1456094 | chr5:1456094      | -10545 | A/T        | 0                 | 0.0166        |
| 1456289 | chr5:1456289      | -10740 | A/G        | 0                 | 0.01666       |
| 1456390 | chr5:1456390      | -10841 | T/C        | 0                 | 0.0166        |
| 1456549 | 5'VNTR/rs70957367 | -11000 | 9/7,8      | 0.2/0.2166        | 0.2833/0.4666 |
| 1457053 | rs2927667         | -11504 | C/T        | 0.11666           | 0             |
| 1457096 | rs3055719         | -11547 | GAAAGAAA/- | 0.1666            | 0.28333       |
| 1457133 | rs56595782        | -11584 | T/C        | 0.08333           | 0             |

|         |               |        |                  |                        |            |
|---------|---------------|--------|------------------|------------------------|------------|
| 1457317 | rs2937649     | -11768 | A/G              | 0.1                    | 0          |
| 1457488 | rs180911129   | -11939 | C/T              | 0.01666                | 0          |
| 1457554 | rs748209      | -12005 | G/T              | 0.1666                 | 0.3        |
| 1457659 | rs111306318   | -12110 | G/T              | 0.0333                 | 0          |
| 1457870 | rs74469586    | -12321 | C/G              | 0                      | 0.01666    |
| 1457916 | rs577218594   | -12367 | A/T              | 0                      | 0.01666    |
| 1457986 | rs905201      | -12437 | A/G              | 0.3                    | 0.3        |
| 1458018 | rs2937650     | -12469 | C/T              | 0.1666                 | 0.3        |
| 1458082 | rs191008023   | -12533 | A/G              | 0.0166                 | 0.01666    |
| 1458172 | rs538162580   | -12623 | C/A              | 0.0166                 | 0          |
| 1458173 | rs549689763   | -12624 | T/A              | 0.0166                 | 0          |
| 1458189 | rs113757913   | -12640 | C/G              | 0.0166                 | 0          |
| 1458335 | rs140756212   | -12786 | C/T              | 0                      | 0.0333     |
| 1458371 | chr5:1458371  | -12822 | C/T              | 0                      | 0.01666    |
| 1458400 | rs2937651     | -12851 | C/T              | 0.0833                 | 0          |
| 1458838 | rs549654983   | -13289 | G/A              | 0.05                   | 0          |
| 1458888 | -13kb-indel   | -13339 | AC/-             | 0.10                   | 0          |
| 1458898 | rs146717703   | -13349 | G/A              | 0.20833                | 0          |
| 1459829 | -14kb-VNTR    | -14280 | 2/1,3,4          | 0.0333/0.01666/0.31667 | 0/0/0.2666 |
| 1460131 | rs11750173    | -14582 | G/A              | 0.03333                | 0.11666    |
| 1460132 | rs2937652     | -14583 | C/T              | 0.10                   | 0          |
| 1460177 | rs115571588   | -14628 | G/A              | 0.01666                | 0          |
| 1460529 | -15.0kb-indel | -14980 | (TTTG)1/2        | 0.11666                | 0.0666     |
| 1460608 | -15.1kb-indel | -15059 | GGGCAGGGTGGC)1/. | 0.10                   | 0          |
| 1460793 | rs188477182   | -15244 | C/T              | 0.01666                | 0          |
| 1461166 | rs7737692     | -15617 | T/C              | 0.45                   | 0.383      |
| 1461201 | rs16878553    | -15652 | A/T              | 0.1                    | 0          |

<sup>a</sup> GRCh37.p13.

<sup>b</sup> TSS = 1.

<sup>c</sup> Highlight: 27 new polymorphisms in chr5: 20.1%.
